1 **Impact of cobas PCR Media Freezing on SARS-CoV-2 Viral RNA Integrity and Whole**  
2 **Genome Sequencing Analyses**

3

4 Patrick Benoit,<sup>a</sup> Floriane Point,<sup>b</sup> Simon Gagnon,<sup>c</sup> Daniel E. Kaufmann,<sup>b, c, d</sup> Cécile Tremblay,<sup>a, b, c</sup>  
5 Richard Paul Harrigan<sup>e</sup>, Isabelle Hardy,<sup>a, b, c</sup> François Coutlée,<sup>a, b, c</sup> Simon Grandjean Lapierre,<sup>a, b, c</sup> #

6

7 <sup>a</sup> Department of Microbiology, Infectious Diseases and Immunology, Université de Montréal,  
8 Montréal, Québec, Canada

9 <sup>b</sup> Immunopathology Axis, Centre de Recherche du Centre Hospitalier de l'Université de Montréal,  
10 Montréal, Québec, Canada

11 <sup>c</sup> Microbiology and Molecular Biology Services, Centre Hospitalier de l'Université de Montréal,  
12 Montréal, Québec, Canada

13 <sup>d</sup> Department of Medicine, Université de Montréal, Montréal, Québec, Canada

14 <sup>e</sup> Department of Medicine, University of British Columbia, Vancouver, British Columbia, Canada

15

16 Running head: Impact of freezing for SARS-CoV-2 genome sequencing

17

18 # Address correspondence to

19 Simon Grandjean Lapierre MD MSc <sup>a, b, c, #</sup>

20 +1.514.890.8000 Ext 20935

21 [simon.grandjean.lapierre@umontreal.ca](mailto:simon.grandjean.lapierre@umontreal.ca)

22

23 Word count: 2032

*For submission to Journal of Clinical Microbiology*

24 **ABSTRACT**

25 SARS-CoV-2 whole genome sequencing is an important molecular biology tool performed to  
26 support many aspects of the response to the pandemic. Freezing of primary clinical nasopharyngeal  
27 swab samples and shipment to reference laboratories is usually required since RNA sequencing is  
28 rarely available in routine clinical microbiology laboratories where initial diagnosis and support  
29 to outbreak investigations occur. The cobas PCR Media transport medium developed by Roche  
30 facilitates high throughput analyses on cobas multianalyzer PCR platforms. There is no data on  
31 the stability of SARS-CoV-2 RNA after freezing and thawing of clinical samples in this transport  
32 medium, but potential denaturing of the molecular template could impair test results. Our objective  
33 was to compare the quality and results of SARS-CoV-2 genomic sequencing when performed on  
34 fresh or frozen samples in cobas PCR Media. Viral whole genome sequencing was performed  
35 using Oxford Nanopore Technologies MinION platform. Genomic coverage and sequencing depth  
36 did not significantly differ between fresh and frozen samples (n=10). For samples with lower viral  
37 inoculum and PCR cycle threshold above 30, sequencing quality scores and detection of single  
38 nucleotide polymorphisms did not differ either. Freezing of cobas PCR Media does not negatively  
39 affect the quality of SARS-CoV-2 RNA sequencing results and it is therefore a suitable transport  
40 medium for outsourcing sequencing analyses to reference laboratories. Those results support  
41 secondary use of diagnostic nasopharyngeal swab material for viral sequencing without  
42 requirement for additional clinical samples.

*For submission to Journal of Clinical Microbiology*

## 43 INTRODUCTION

44 SARS-CoV-2 viral genomic sequencing plays an important role in the short and long-term  
45 responses to the COVID-19 pandemic including global and national surveillance of the virus  
46 evolution, understanding of SARS-CoV-2 natural history of disease and outbreak investigations  
47 (1-4). Viral whole genome sequencing primarily occurs in reference laboratories and is rarely  
48 performed where clinical diagnosis or outbreak investigations happen. Therefore, freezing of  
49 primary samples is required prior to viral genomic amplification and sequencing.

50  
51 cobas PCR Media is a transport medium developed by Roche that simplifies linkage between pre-  
52 analytical sampling and analytical testing and is adapted for high throughput analyses on cobas  
53 multianalyzer PCR platforms. It contains guanidine hydrochloride which is a denaturing agent  
54 used to dissociate nucleoproteins and inactivate RNases. The manufacturer does not recommend  
55 freezing the cobas PCR Media because of risks of molecular template denaturation (5). Freezing  
56 of other transport media was previously shown not to negatively impact the detection of SARS-  
57 CoV-2 by RT-PCR (6). However, it is unknown whether, and how, freezing of cobas PCR Media  
58 indeed denatures SARS-CoV-2 RNA and if it negatively affects viral genomic sequencing.

59  
60 In this study, we compared the quality and results of SARS-CoV-2 whole genome sequencing  
61 between fresh and frozen samples obtained from combined oral and nasopharyngeal swabs  
62 (ONPS). We used matched split samples collected in cobas PCR Media and either processed  
63 following collection and storage at 4°C or frozen for one week at -80°C and thawed prior to  
64 sequencing. Our protocol and analysis address the necessity for most clinical microbiology

*For submission to Journal of Clinical Microbiology*

65 laboratories to refer frozen primary clinical samples that were used for diagnostic purposes to  
66 reference laboratories in order to access viral genomic information.

67

## 68 **MATERIALS AND METHODS**

### 69 **CLINICAL SAMPLES**

70 Ten clinical samples were included in this study. All samples were a combined ONPS submitted  
71 to our laboratory in cobas PCR Media initially found to be positive for SARS-CoV-2 using the  
72 FDA emergency use authorization (EUA) approved and validated cobas 8800 automated RT-PCR  
73 system which simultaneously tests both the ORF1 a/b and E-gene viral molecular targets (7). To  
74 assess the impact of viral load or initial amount of RNA template on sequencing, we purposively  
75 included samples testing positive at a broad range of cycle threshold (Ct) from 14.4 to 34.7 for the  
76 ORF1 a/b target. This strategy ensured inclusion of samples with low (high Ct) and high (low Ct)  
77 viral loads.

78

### 79 **FREEZING AND THAWING**

80 Following initial positive RT-PCR testing, samples were split in equal volumes. The first half of  
81 each samples was maintained at 4°C, according to manufacturer's recommendation, and then  
82 processed for whole genome sequencing as described below. The second half of each sample was  
83 frozen at -80°C for 7 days and thawed. RT-PCR was then repeated using the same cobas 8800  
84 system and viral genomic sequencing was performed using identical methods.

85

### 86 **SARS-CoV-2 GENOMIC SEQUENCING**

*For submission to Journal of Clinical Microbiology*

87 Viral RNA was extracted from 0.2 mL of cobas PCR Media using Maxwell® 16 instrument  
88 (Promega, Madison, WI, USA) for final elution in 30µL. Viral whole genome sequencing was  
89 performed using the ARTIC Network V3 protocol on Oxford Nanopore Technologies (ONT)  
90 (Oxford, United Kingdom) MinION® long read sequencing platform. Since its initial publication  
91 online in January 2020, the ARTIC protocol has become one of the most widely used approach to  
92 SARS-CoV-2 genomic sequencing. This protocol has yielded a significant sequence contribution  
93 to the GISAID global database and is currently used for surveillance by many public health  
94 agencies (8, 9). Briefly, genome amplification was performed by reverse transcriptase multiplex  
95 PCR using nCoV-2019 V3 primer combinations (Integrated DNA Technologies). This set of  
96 primers was previously shown to produce high genomic coverage with low variance on the whole  
97 viral genome (8). RT-PCR amplicons were assessed by Qubit® fluorometric DNA Quantification  
98 (Thermo Fisher Scientific, Waltham, MA, USA). For samples with post RT-PCR DNA quantity  
99 below 250 ng, we omitted the dilution step of the sample in 45 µL of molecular grade water before  
100 library preparation as recommended in the ARTIC protocol. Such low inoculums were observed  
101 in three samples with both ORF1 a/b and E-gene targets Cts over 30 (samples 1, 2, 3). Sequencing  
102 libraries were prepared following ONT protocol for genomic DNA with native barcoding and  
103 using 9.4.1 flow cells on the MinION® platform. Raw sequencing reads fast5 files were base called  
104 with high accuracy using ONT proprietary software Guppy (v3.4.5). Reads were demultiplexed  
105 and filtered using the online available ARTIC network bioinformatic pipeline solution (10). This  
106 filtering process includes exclusion of sequencing reads respectively below 400 and above 700  
107 base pairs which do not correspond to expected amplicons length resulting from the RT-PCR  
108 primer set. Reads were mapped to the Wuhan-Hu-1 SARS-CoV-2 reference genome (GeneBank  
109 accession number MN908947.3) using minimap2 (v2.17). Predominantly sequenced nucleotides

*For submission to Journal of Clinical Microbiology*

110 at positions for which a minimal depth of 20 reads had been achieved were used to generate  
111 consensus viral genomic sequences. Potential subpopulations or mixed infections were not  
112 considered, and hence a unique consensus sequence was generated for each isolate.

113

#### 114 **DATA ANALYSIS**

115 We compared mean sequencing Q-scores with corresponding error rates and accuracy, single  
116 nucleotide polymorphisms (SNPs) identification and diversity of sequenced alleles on identified  
117 SNP genomic positions. We used those later metrics as surrogate markers of post-freezing viral  
118 RNA integrity. Q-scores represent ONT's sequencing platform and base calling software internal  
119 assessment of sequencing read quality. The Q-score of a given base is defined as  $Q = 10\log_{10}(e)$   
120 where (e) is the estimated probability of the base call being wrong. We used a two-tailed paired  
121 samples t-test with an alpha value of 0.05 to compare pre- and post-freezing variables. All  
122 statistical analyses were performed using GraphPad Prism (San Diego, CA USA).

123

124 To simulate prospective outbreak investigation, we supplemented the pre- and post-freezing  
125 sequence datasets with a back catalog of 50 SARS-CoV-2 genomic sequences from our institution  
126 (unpublished data) hence generating two mocked nosocomial viral pangenomes. We  
127 independently analyzed both augmented data sets as if searching for potential transmission  
128 clusters. Consensus sequences were compared, and phylogenetic trees were built using UGENE  
129 (v37) with the PHYLIP Neighbor Joining method without bootstrapping. To simulate national  
130 surveillance and assessment of circulating viral clades, we independently compared the pre- and  
131 post-freezing sequence datasets with published and well described SARS-CoV-2 reference  
132 genomes submitted to Nextstrain (<https://nextstrain.org/sars-cov-2/>) (11).

*For submission to Journal of Clinical Microbiology*

133

134 All laboratory testing including sequencing and data analyses were performed in Centre  
135 Hospitalier de l'Université de Montréal. Patients' symptoms nature and relative temporality with  
136 clinical sampling, or potential person to person transmission events were not taken into  
137 consideration.

138

### 139 **DATA AVAILABILITY**

140 SARS-CoV-2 sequences from this study are available at GenBank under continuous accession  
141 numbers MW309425 to MW309442.

142

### 143 **RESULTS**

#### 144 **RT-PCR**

145 Upon initial testing after maintenance of clinical samples at 4°C in cobas PCR Media, RT-PCR  
146 Cts ranged from 14.4 to 34.7 and 14.9 to 34.9 respectively for the ORF1 a/b and E-gene targets.  
147 After freezing for 7 days at -80°C, RT-PCR Cts ranged between 17.8 to 31.8 and 17.9 to 33.8 for  
148 the same targets. No statistically significant difference was observed between pre- and post-  
149 freezing Cts for the ORF1 a/b target (*p-value* 0.64). One sample only became positive on the E-  
150 gene target after freezing. Excluding this sample from the analysis, post-freezing Cts for the E-  
151 gene target were 1.1 Ct higher after freezing (*p-value* 0.01) (Table 1).

152

#### 153 **VIRAL GENOMIC SEQUENCING**

154 No statistically significant difference was observed between the sequencing yields before or after  
155 freezing. Indeed, freezing did not negatively impact the total number of sequenced bases and

*For submission to Journal of Clinical Microbiology*

156 mapped reads with pre- / post-freezing mean deltas of 11 Mb (*p-value* 0.57) and 938 reads (*p-*  
157 *value* 0.31) for those key metrics. Also importantly, 20X sequencing depth, allowing for wild type  
158 or variant allelic identification within our protocol, was achieved for an average of 83.9% and  
159 83.7% of the viral genome respectively before and after freezing (*p-value* 0.90) (Table 2). Such  
160 similarity was also observed for all other evaluated depth thresholds (1X, 5X, 10X, 50X). As  
161 expected, sequencing data yield, depth and coverage were inversely correlated to the Ct value both  
162 in pre- (*p-value* 0.0007) and post-freezing (*p-value* 0.0003) samples. Less sequencing data was  
163 hence generated in the sub-group of low viral inoculum and high Ct samples 1, 2 and 3 but freezing  
164 did not negatively impact sequencing yields in this subgroup either (Fig. 1).

165

166 No statistically significant decrease was observed in Q-scores (*p-value* 0.07) and base call  
167 accuracy (*p-value* 0.10) after freezing (Table 3). Except for samples 1 (ORF1 a/b Ct 34.74) and 2  
168 (ORF1 a/b Ct 32.16), freezing did not impact SNP detection and identified mutations were  
169 identical in both sequencing analyses. Looking in more depth at each single read for those specific  
170 mutation sites, the percentage of alternate bases leading to SNP calling did not significantly change  
171 after freezing (*p-value* 0.31). This ratio of variant versus wild type alleles at each mutation site  
172 was the same before and after freezing and suggests that the viral molecular template was not  
173 significantly degraded by the freezing process in cobas PCR Media.

174

175 In the mocked outbreak investigation, samples with higher genomic similarity were identified.  
176 Although our study was not a molecular epidemiology study and did not include clinical  
177 correlation with putative transmission events, those molecular clusters were identical in both pre-  
178 and post-freezing analyses (Fig. 2). For the surveillance clade typing simulated application,



*For submission to Journal of Clinical Microbiology*

179 phylogenetic placement was also identical in the pre- and post-freezing mocked data sets (Fig. 3).  
180 For viral clade typing and comparison to reference genomes, samples 1 and 2 could not be included  
181 in the analysis because of too small genomic coverage. All phylogenetic placement results were  
182 expected and in agreement with previously described findings on identical SNP typing.

183

## 184 **DISCUSSION**

185 In our study, a single freeze - thaw cycle of ONPS clinical samples in cobas PCR Media did not  
186 significantly impact analytical sensitivity of SARS-CoV-2 RT-PCR on cobas 8800® automated  
187 system on this limited set of samples. Although we observed a Ct increase of 1.1 (*p-value* 0.01)  
188 after freezing for the E-gene target, one of our samples was also found to be positive for this target  
189 only after freezing. Freezing the sample in cobas PCR Media did not degrade viral molecular  
190 templates and did not negatively affect viral genomic sequencing analyses. Khiri *et al* had  
191 previously shown that freezing of cervical samples in cobas PCR Media did not negatively impact  
192 the sensitivity of PCR for human papillomavirus detection (12). Our study confirms this holds true  
193 for SARS-CoV-2. To our knowledge, this is the first study to formally evaluate the impact of  
194 freezing clinical samples in cobas PCR Media for downstream sequencing analyses either for  
195 SARS-CoV-2 or for any other target pathogen or molecular template. Our study confirms the  
196 ability of cobas PCR Media to maintain SARS-CoV-2 genomic RNA at -80°C for subsequent  
197 sequencing analyses. Note that the PCR amplicons generated in this study are relatively small  
198 (~400 bp), so this protocol may be more robust to RNA damage than methods which require long,  
199 intact starting molecules. Our results should also not be generalized to other transport media  
200 without independent confirmation.

201

*For submission to Journal of Clinical Microbiology*

202 Our study included three samples with RT-PCR Cts above 30.0 which are considered to have a  
203 lower viral load. For those samples, SNP calling showed variability and genomic coverage was  
204 insufficient to allow detailed phylogenetic analyses. This phenomenon was observed both before  
205 and after freezing and is hence believed to be due to low viral inoculum rather than transport  
206 medium related viral RNA denaturation. Our study included only 10 samples but the extensive  
207 comparability between pre- and post-freezing sequencing results suggests that a higher  
208 denominator would not have led to different conclusions. It is possible that a freezing period longer  
209 than 7 days would have led to worse sequencing results after thawing but our protocol did not  
210 assess such longer-term effect. Seven days represents a sufficient delay for transportation to  
211 reference laboratories performing viral sequencing and our study hence provides meaningful  
212 information to clinical laboratories involved in routine diagnostic testing.

213

## 214 **CONCLUSION**

215 Our study demonstrates that the freezing of cobas PCR Media at -80°C does not affect viral  
216 genomic sequencing quality and results for SARS-CoV-2. The consistent results between pre- and  
217 post-freezing support potential secondary use of diagnostic oral and nasopharyngeal swab material  
218 for viral sequencing without requirement for additional clinical sampling. Our findings will  
219 simplify the collection and storage of samples in laboratories where this transport medium is  
220 utilized.

*For submission to Journal of Clinical Microbiology*

221 **ACKNOWLEDGEMENT**

222 This study was funded by the *Réseau SIDA-Maladies Infectieuses* of the *Fond de Recherche Santé*  
223 *Québec*, Roche Diagnostics (Laval, Canada) and CIHR/CITF grant VR2-173203. The funders had  
224 no role in study design, data collection and interpretation, or the decision to submit the work for  
225 publication.

*For submission to Journal of Clinical Microbiology*

226 **REFERENCES**

- 227 - 1. Lo SW, Jamrozy D. 2020. Genomics and epidemiological surveillance. *Nat Rev*  
228 *Microbiol* 18:478.
- 229 - 2. Choi B, Choudhary MC, Regan J, Sparks JA, Padera RF, Qiu X, Solomon IH,  
230 Kuo HH, Boucau J, Bowman K, Adhikari UD, Winkler ML, Mueller AA, Hsu TY,  
231 Desjardins M, Baden LR, Chan BT, Walker BD, Lichterfeld M, Brigl M, Kwon DS,  
232 Kanjilal S, Richardson ET, Jonsson AH, Alter G, Barczak AK, Hanage WP, Yu XG,  
233 Gaiha GD, Seaman MS, Cernadas M, Li JZ. 2020. Persistence and Evolution of SARS-  
234 CoV-2 in an Immunocompromised Host. *N Engl J Med* doi:10.1056/NEJMc2031364.
- 235 - 3. Meredith LW, Hamilton WL, Warne B, Houldcroft CJ, Hosmillo M, Jahun AS,  
236 Curran MD, Parmar S, Caller LG, Caddy SL, Khokhar FA, Yakovleva A, Hall G,  
237 Feltwell T, Forrest S, Sridhar S, Weekes MP, Baker S, Brown N, Moore E, Popay A,  
238 Roddick I, Reacher M, Gouliouris T, Peacock SJ, Dougan G, Torok ME, Goodfellow I.  
239 2020. Rapid implementation of SARS-CoV-2 sequencing to investigate cases of health-  
240 care associated COVID-19: a prospective genomic surveillance study. *Lancet Infect Dis*  
241 20:1263-1272.
- 242 - 4. Wise J. 2020. Covid-19: New coronavirus variant is identified in UK. *BMJ*  
243 371:m4857.
- 244 - 5. Roche. 2019. Qualitative nucleic acid test for use on the cobas 6800/8800  
245 Systems.
- 246 - 6. Rogers AA, Baumann RE, Borillo GA, Kagan RM, Batterman HJ, Galdzicka  
247 MM, Marlowe EM. 2020. Evaluation of Transport Media and Specimen Transport

*For submission to Journal of Clinical Microbiology*

- 248            Conditions for the Detection of SARS-CoV-2 by Use of Real-Time Reverse  
249            Transcription-PCR. *J Clin Microbiol* 58.
- 250        - 7.        Boutin CA, Grandjean-Lapierre S, Gagnon S, Labbe AC, Charest H, Roger M,  
251            Coutlee F. 2020. Comparison of SARS-CoV-2 detection from combined  
252            nasopharyngeal/oropharyngeal swab samples by a laboratory-developed real-time RT-  
253            PCR test and the Roche SARS-CoV-2 assay on a cobas 8800 instrument. *J Clin Virol*  
254            132:104615.
- 255        - 8.        Tyson JR, James P, Stoddart D, Sparks N, Wickenhagen A, Hall G, Choi JH,  
256            Lapointe H, Kamelian K, Smith AD, Prystajecy N, Goodfellow I, Wilson SJ, Harrigan  
257            R, Snutch TP, Loman NJ, Quick J. 2020. Improvements to the ARTIC multiplex PCR  
258            method for SARS-CoV-2 genome sequencing using nanopore. *bioRxiv*  
259            doi:10.1101/2020.09.04.283077.
- 260        - 9.        GISAID. 2020. Genomic epidemiology of hCoV-19. <https://www.gisaid.org/>.  
261            Accessed December 22, 2020.
- 262        - 10.       Nick Loman WR, Andrew Rambaut. 2020. ARTIC-nCoV-bioinformaticsSOP-  
263            v1.1.0. <https://artic.network/ncov-2019/ncov2019-bioinformatics-sop.html>. Accessed 6-  
264            12-2020.
- 265        - 11.       Hadfield J, Megill C, Bell SM, Huddleston J, Potter B, Callender C, Sagulenko P,  
266            Bedford T, Neher RA. 2018. Nextstrain: real-time tracking of pathogen evolution.  
267            *Bioinformatics* 34:4121-4123.
- 268        - 12.       Khiri H, Camus C, Portugal M, Penaranda G, Boyer S, Halfon P. 2014.  
269            [Cytological and virological medium performance and stability assessment using the

*For submission to Journal of Clinical Microbiology*

270 cobas 4800 HPV test (Roche Diagnostics) used in France]. Ann Biol Clin (Paris) 72:213-

271 23.

272

273 **FIGURES**

274 **Figure 1 – ORF1 a/b Ct value correlation with 20X genomic sequencing coverage**

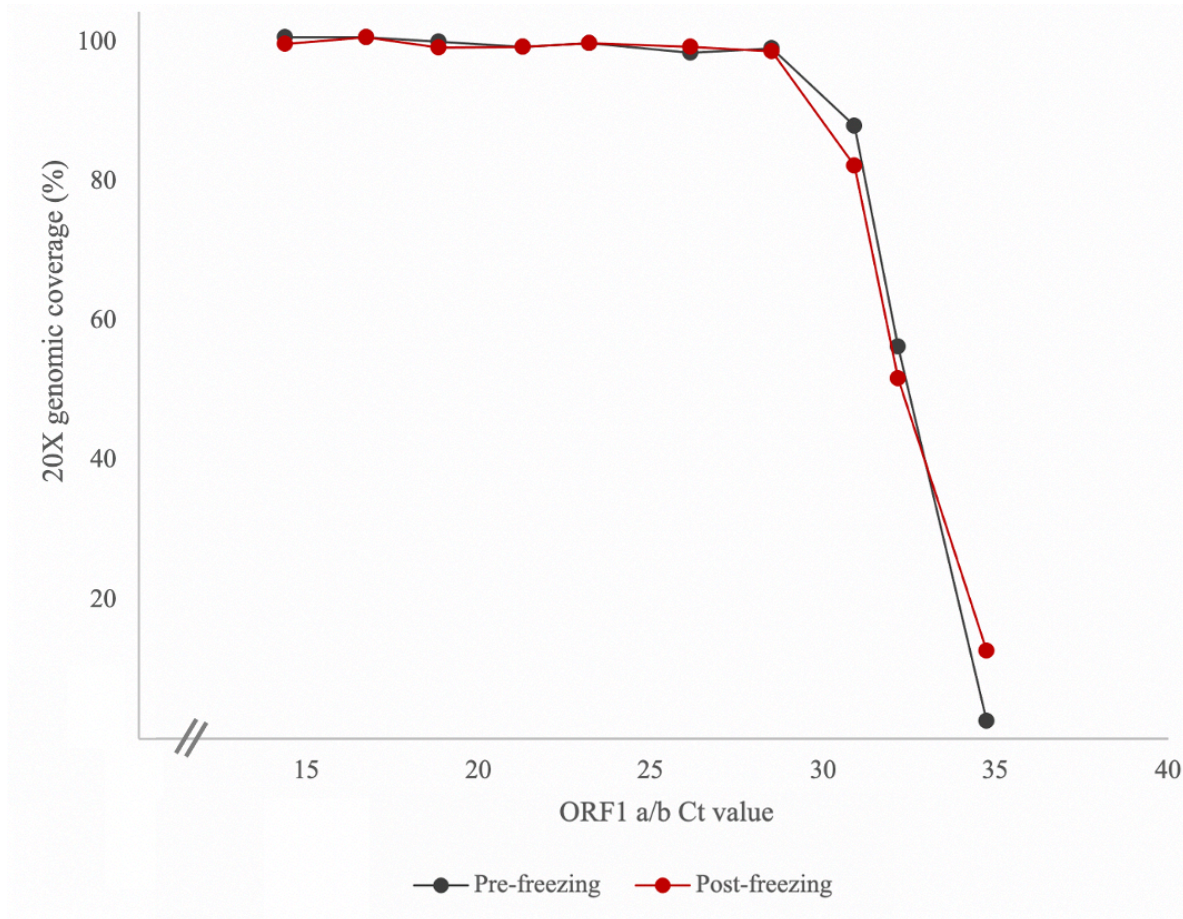

275

276 Figure 1 – Coverage of genome at 20X in relation to pre-freezing Ct value for ORF1 a/b. Less sequencing data was generated with  
277 samples with higher cycle thresholds (Ct) but freezing did not negatively impact sequencing yields.

278 **Figure 2 - Simulated SARS-CoV-2 outbreak investigation**

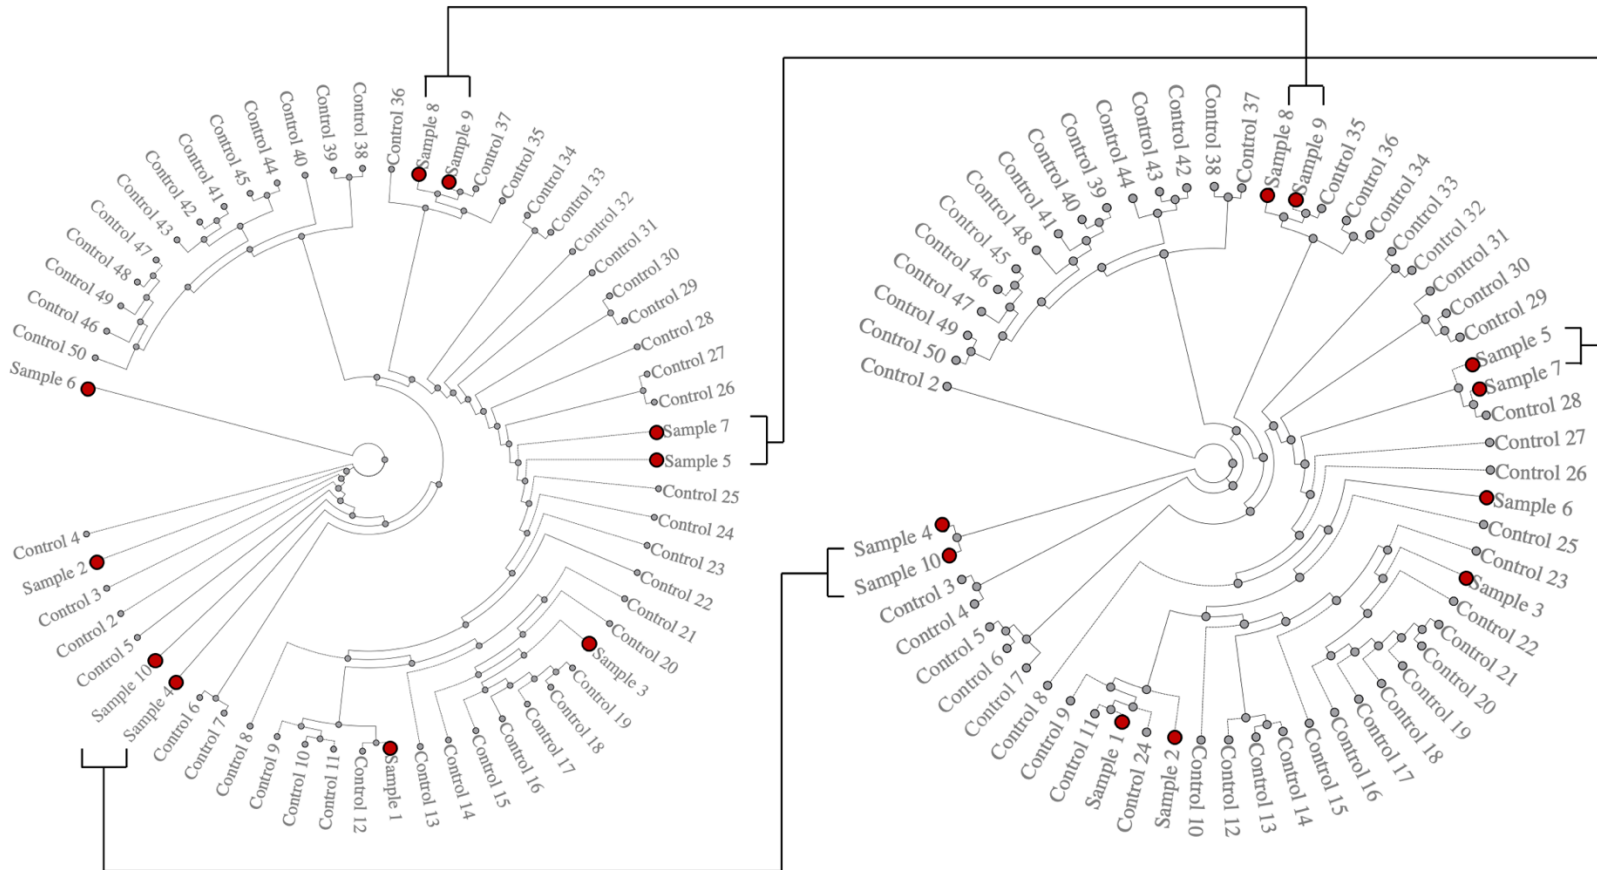

279

280 Figure 2 – A simulated outbreak investigations with a back catalog of 50 SARS-CoV-2 genomic sequences from our institution  
281 (unpublished data). Phylogenetic trees were constructed using UGENE (v37) with the PHYLIP Neighbor Joining method without  
282 bootstrapping. Pre- (left) and post-freezing (right) genomic sequences show identical potential outbreak clusters within our samples.



283 **Figure 3 - SARS-CoV-2 Study Isolates Placement Within Global Reference Sequences**

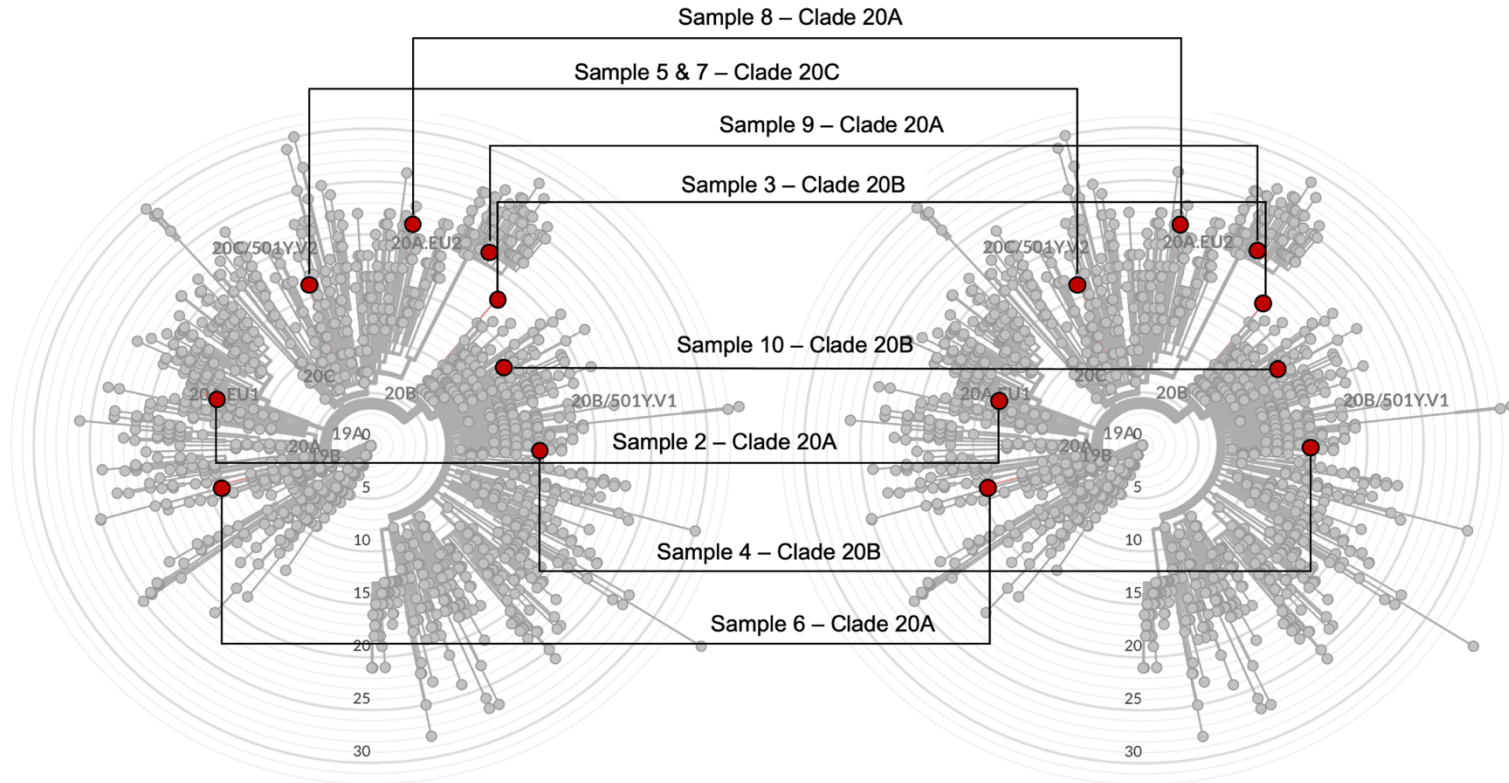

284

285 Figure 3 – Radial rooted phylogenetic representation of SARS-CoV-2 reference sequence submitted to Nextstrain

286 (<https://nextstrain.org/sars-cov-2/>). Pre- (left) and post-freezing (right) genomic sequences (red) showing identical phylogenetic

287 placement within global reference sequences (grey).

288

289 **TABLES**

290 **Table 1 : Impact of cobas PCR Media freezing on SARS-CoV-2 RT-PCR Ct levels**

|                | <b>PRE</b>     |              | <b>POST</b>    |              | <b>DELTA (PRE - POST)</b> |                       |
|----------------|----------------|--------------|----------------|--------------|---------------------------|-----------------------|
|                | ORF1 a/b<br>CT | E-gene<br>CT | ORF1 a/b<br>CT | E-gene<br>CT | ORF1 a/b<br>$\Delta$ CT   | E-gene<br>$\Delta$ CT |
| 1              | 34.7           | NEG          | 31.8           | 33.8         | 3.0                       | N/A                   |
| 2              | 32.2           | 34.9         | 30.4           | 34.5         | 1.8                       | 0.4                   |
| 3              | 30.9           | 32.4         | 30.8           | 33.2         | 0.1                       | -0.8                  |
| 4              | 28.5           | 29.4         | 28.3           | 29.4         | 0.2                       | -0.1                  |
| 5              | 26.1           | 26.5         | 26.4           | 27.4         | -0.3                      | -0.9                  |
| 6              | 23.2           | 23.3         | 24.0           | 24.5         | -0.8                      | -1.2                  |
| 7              | 21.3           | 21.6         | 23.0           | 23.2         | -1.7                      | -1.6                  |
| 8              | 18.9           | 19.2         | 20.4           | 20.9         | -1.6                      | -1.8                  |
| 9              | 16.7           | 16.6         | 16.9           | 17.4         | -0.1                      | -0.8                  |
| 10             | 14.4           | 14.9         | 17.8           | 17.9         | -3.4                      | -3.0                  |
| Mean           | 24.7           | 24.3         | 25.0           | 26.2         | -0.3                      | -1.1                  |
| <i>p-value</i> |                |              |                |              | 0.64                      | 0.01                  |

291

292 Table 1 – Difference in SARS-CoV-2 RT-PCR Ct levels after 7-day freezing in cobas PCR Media. Samples are presented in

293 decreasing order of Ct value on pre-freezing ORF1 a/b RT-PCR.

294 **Table 2 - Impact of freezing on SARS-CoV-2 Genomic Sequencing Data Yield**

295

|         | <b>PRE</b> |              |       |               | <b>POST</b> |              |       |               | <b>DELTA (PRE-POST)</b> |       |       |               |
|---------|------------|--------------|-------|---------------|-------------|--------------|-------|---------------|-------------------------|-------|-------|---------------|
|         | Bases      | Mapped reads | 20X   | Average depth | Bases       | Mapped reads | 20X   | Average depth | Bases                   | Reads | 20X   | Average depth |
|         | Mb         | n            | %     | n             | Mb          | n            | %     | n             | Mb                      | n     | Δ %   | Δ n           |
| 1       | 16.7       | 151          | 2.6   | 2             | 17.9        | 638          | 12.6  | 8             | -1.2                    | -487  | -10.0 | -6            |
| 2       | 19.1       | 5295         | 55.9  | 66            | 14.8        | 4950         | 51.4  | 63            | 4.3                     | 345   | 4.5   | 4             |
| 3       | 39.4       | 18782        | 87.3  | 236           | 19.9        | 10858        | 81.6  | 136           | 19.5                    | 7924  | 5.7   | 100           |
| 4       | 72.6       | 32491        | 98.4  | 414           | 80.9        | 33389        | 98.0  | 426           | -8.3                    | -898  | 0.4   | -12           |
| 5       | 68.4       | 34382        | 97.7  | 440           | 125.7       | 36137        | 98.6  | 461           | -57.3                   | -1755 | -0.8  | -21           |
| 6       | 179.4      | 38324        | 99.2  | 489           | 115.8       | 36751        | 99.2  | 470           | 63.6                    | 1573  | 0.0   | 19            |
| 7       | 140.7      | 38000        | 98.6  | 483           | 176.9       | 38155        | 98.6  | 483           | -36.2                   | -155  | 0.0   | 0             |
| 8       | 216.2      | 37508        | 99.3  | 477           | 142.3       | 37133        | 98.5  | 474           | 73.9                    | 375   | 0.8   | 3             |
| 9       | 140.7      | 38534        | 100.0 | 492           | 204.2       | 38626        | 100.0 | 494           | -63.5                   | -92   | 0.0   | -2            |
| 10      | 217.4      | 39628        | 100.0 | 499           | 102.7       | 37075        | 99.0  | 471           | 114.7                   | 2553  | 1.0   | 27            |
| Mean    | 111.1      | 28310        | 83.9  | 360           | 100.1       | 27371        | 83.7  | 348           | 11.0                    | 938   | 0.2   | 11            |
| p-value |            |              |       |               |             |              |       |               | 0.57                    | 0.31  | 0.90  | 0.33          |

296

297 Table 2 – Difference in SARS-CoV-2 sequencing generated bases, reads and corresponding genomic coverage at various depth

298 thresholds after 7-day freezing in cobas PCR Media. Samples are presented in decreasing order of Ct value on pre-freezing ORF1 a/b

299 RT-PCR.

300 **Table 3 - Impact of cobas PCR Media freezing on SARS-CoV-2 Genomic Sequencing Accuracy**

|                | PRE     |          |           |     |                  | POST    |          |           |     |                  | DELTA (PRE - POST) |          |           |      |                  |
|----------------|---------|----------|-----------|-----|------------------|---------|----------|-----------|-----|------------------|--------------------|----------|-----------|------|------------------|
|                | Q-Score | Accuracy | Non-calls | SNP | Alternate allele | Q-Score | Accuracy | Non-calls | SNP | Alternate allele | Q-Score            | Accuracy | Non-calls | SNP  | Alternate allele |
|                |         | %        | n         | n   | %                | N/A     | %        | n         | n   | %                |                    | Δ %      | Δ n       | Δ n  | Δ %              |
| 1              | 12.9    | 99.2     | 27306     | 0   | N/A              | 13.0    | 99.3     | 21402     | 3   | 89.1             | -0.1               | 0.0      | 5904      | -3   | N/A              |
| 2              | 13.1    | 99.3     | 4379      | 9   | 72.2             | 12.8    | 99.1     | 2570      | 6   | 86.1             | 0.3                | 0.2      | 1809      | 3    | -13.9            |
| 3              | 13.3    | 99.4     | 664       | 18  | 84.7             | 12.9    | 99.2     | 1011      | 18  | 84.4             | 0.4                | 0.2      | -347      | 0    | 0.3              |
| 4              | 13.7    | 99.6     | 251       | 15  | 84.1             | 13.7    | 99.6     | 12        | 15  | 87.1             | 0.0                | 0.0      | 239       | 0    | -2.9             |
| 5              | 13.7    | 99.6     | 3         | 16  | 89.8             | 13.6    | 99.5     | 1         | 16  | 89.2             | 0.1                | 0.0      | 2         | 0    | 0.7              |
| 6              | 13.6    | 99.5     | 0         | 11  | 88.0             | 13.4    | 99.5     | 0         | 11  | 87.8             | 0.2                | 0.1      | 0         | 0    | 0.2              |
| 7              | 13.6    | 99.6     | 0         | 16  | 89.4             | 13.6    | 99.5     | 0         | 16  | 88.8             | 0.0                | 0.0      | 0         | 0    | 0.5              |
| 8              | 13.6    | 99.5     | 0         | 21  | 88.9             | 13.6    | 99.5     | 0         | 21  | 88.2             | 0.0                | 0.0      | 0         | 0    | 0.8              |
| 9              | 13.7    | 99.6     | 0         | 21  | 89.3             | 13.6    | 99.5     | 0         | 21  | 89.4             | 0.0                | 0.0      | 0         | 0    | -0.2             |
| 10             | 13.6    | 99.5     | 0         | 14  | 89.3             | 13.5    | 99.5     | 0         | 14  | 90.2             | 0.1                | 0.0      | 0         | 0    | -0.9             |
| Mean           | 13.5    | 99.5     |           | 14  | 86.2             | 13.4    | 99.4     |           | 14  | 88.0             | 0.1                | 0.0      | 761       | 0    | -1.7             |
| <i>p-value</i> |         |          |           |     |                  |         |          |           |     |                  | 0.07               | 0.10     | 0.24      | 1.00 | 0.31             |

301

302 Table 3 - Differences in SARS-CoV-2 sequencing accuracy and single nucleotide polymorphisms identification after 7-day freezing in  
 303 cobas PCR Media. Samples are presented in decreasing order of Ct value on pre-freezing ORF1 a/b RT-PCR.

304
